1 **Research Article**

2

3 **B cell Compartmentalization in Blood and Cerebrospinal Fluid of HIV- Infected**  
4 **Ugandans with Cryptococcal Meningitis**

5

6 Samuel Okurut <sup>1,2,4</sup>, David B. Meya <sup>1,3,6</sup>, Freddie Bwanga <sup>2</sup>, Joseph Olobo <sup>10</sup>,

7 Michael A. Eller <sup>7,8</sup>, Fatim Cham-Jallow <sup>4,7,8</sup>, Paul R. Bohjanen <sup>6</sup>, Harsh Pratap<sup>5</sup>,

8 Brent E. Palmer <sup>5</sup>, Katharine H. Hullsiek <sup>6</sup>, Yukari C. Manabe <sup>1,9</sup>, David R. Boulware

9 <sup>6</sup>, and Edward N. Janoff <sup>5</sup>

10

11 <sup>1</sup> Research Department, Infectious Diseases Institute, Makerere University, Box

12 22418, Kampala, Uganda; <sup>2</sup> Department of Microbiology, School of Biomedical

13 Sciences, College of Health Sciences, Makerere University, 7072, Kampala, Uganda;

14 <sup>3</sup> Department of Medicine, School of Medicine, College of Health Sciences, Makerere

15 University, 7072, Kampala, Uganda; <sup>4</sup> Laboratory Department, Makerere University

16 Walter Reed Project, 16524, Kampala, Uganda; <sup>5</sup> Mucosal and Vaccine Research

17 Program Colorado, Department of Medicine, University of Colorado Denver, Aurora,

18 Colorado, USA; Denver Veterans Affairs Medical Center, Denver CO, 80045, USA; <sup>6</sup>

19 Division of Infectious Diseases and International Medicine, Department of Medicine,

20 University of Minnesota, Minneapolis, MN, 55455, USA; <sup>7</sup> U.S. Military HIV Research

21 Program, Walter Reed Army Institute of Research, Silver Spring, MD, 20910, USA; <sup>8</sup>

22 Henry M. Jackson Foundation for the Advancement of Military Medicine, Bethesda,

23 MD, 20817, USA; <sup>9</sup> Division of Infectious Diseases, Department of Medicine, John

24 Hopkins University School of Medicine, Baltimore, Maryland, MD, 21205, USA; <sup>10</sup> Dept

25 of Immunology and Molecular Biology, School of Biomedical Sciences, College of  
26 Health Sciences, Makerere University, Box 7072, Kampala, Uganda.

27

28 **Address Correspondence to:** Infectious Diseases Institute, Makerere University Box  
29 22418, Kampala, Uganda. Email: [okuruts@gmail.com](mailto:okuruts@gmail.com). Mobile: +256-782-003931 or  
30 Tel: +256-312-307000

31

32 **Abstract: 211 words**

33 **Importance: 144 words**

34 **Text: 3585 words**

35

### 36 **Funding**

37 This research was supported in part by the National Institutes of Health  
38 (U01AI089244 (DRB, DBM), R01NS086312(DRB, DBM), K01TW010268 (DRB,  
39 DBM), R01AI108479 (ENJ)) and Veterans Affairs Research Service I01CX001464  
40 (ENJ), the Fogarty International Center 1D43TW009771 (YCM), the GlaxoSmithKline-  
41 Trust in Science Africa (COL100044928) (SO). This work was in part supported by a  
42 cooperative agreement (W81XWH-07-2-0067) between the Henry M. Jackson  
43 Foundation for the Advancement of Military Medicine, Inc., and the U.S. Department  
44 of Defense (DOD). The views expressed are those of the authors and should not be  
45 construed to represent the positions of the U.S. Army or the Department of Defense.  
46 The funders had no role in the study design, data collection, data analysis, manuscript  
47 preparation and the decision to publish the work.

48 **Conflicts of Interest:** Authors declare no conflict of interest and all the authors read  
49 and approved the final version of the manuscript.

50 **Footnotes**

51           This work was presented in part at the Keystone Symposia on HIV Vaccines  
52 (X5) conference joint with the golden anniversary of B cell discovery meeting in Banff  
53 Springs, Banff, Alberta Canada, poster number X5 2023, 22-27th March 2015 and at  
54 the EMBO-AIDS related mycoses workshop, in Cape Town, South Africa, poster  
55 number 24, 13-15 Jul 2016. Correspondence to Samuel Okurut, Infectious diseases  
56 Institute, Box 22418, Kampala, Uganda, Tel: +256-782-003931, Email:  
57 okuruts@gmail.com.

58           Current addresses; Samuel Okurut was Research Department, Infectious  
59 Disease Institute, Makerere University. Fatim-Cham Jallow, World Health  
60 Organization African Regional Office in Brazzaville, Republic of Congo. Harsh Pratap  
61 Vancouver, Canada.

62 **Abstract:**

63 **Background:** Activated B cells modulate infection by differentiating into pathogen-  
64 specific antibody-producing effector plasmablasts/plasma cells, memory cells and  
65 immune regulatory B cells. In this context, the B cell phenotypes that infiltrate the central  
66 nervous system during HIV and cryptococcal meningitis co-infection are ill defined.

67 **Methods:** We characterized clinical parameters, mortality and B cell phenotypes in blood  
68 and CSF by flow cytometry in HIV-infected adults with cryptococcal (n=31), and non-  
69 cryptococcal meningitis (n=12), and healthy control subjects with neither infection (n=10).

70 **Results:** Activation of circulating B cells (CD21<sup>low</sup>) was significantly higher in blood of  
71 subjects with HIV infection compared with healthy controls, and greater yet in matched  
72 CSF B cells (p<0.001). Among B cell subsets, elevated frequencies of memory and  
73 plasmablasts/plasma cells most clearly distinguished the CSF from blood compartments.  
74 With cryptococcal meningitis, lower frequencies of expression of the regulatory protein  
75 PD-1 on plasmablasts/plasma cells in blood (median 7%) at presentation was associated  
76 with significantly decreased 28-day survival (29% (4/14 subjects)), whereas higher PD-1  
77 expression (median 46%) characterized subjects with higher survival (88% (14/16  
78 subjects)).

79 **Conclusion:** With HIV infection, B cell differentiation and regulatory markers are discrete  
80 elements of the circulating and CSF compartments with clinical implications for  
81 cryptococcal disease outcome, potentially due to their effects on the fungus and other  
82 local immune cells.

83

84 **Key words:** B cell subsets, activation, plasmablasts/plasma cells, PD-1, HIV,  
85 cryptococcal meningitis, survival

86

## 87 **Importance**

88 Mortality from HIV associated cryptococcal meningitis co-infection remains  
89 abnormally high despite the use of optimal antifungal therapy and highly active  
90 antiretroviral therapy to treat HIV-1 and cryptococcal meningitis co-infected patients.  
91 However, it is not clear what contributes to the excess mortality after onset of  
92 cryptococcosis. We found an association of high percent expression of programmed  
93 death-1 (PD-1) receptor on plasmablasts/plasma cells population with host survival. We  
94 also found high expression of B cell activated cells and more mature B cell population in  
95 CSF compared to blood and this B cell dominant population in CSF of cryptococcosis  
96 patients expressed more PD-1. Together, these data in CSF and blood of cryptococcosis  
97 patients may inform further mechanistic studies of cryptococcus and host interaction to  
98 advance our understanding of the possible pathways that may be targeted to influence  
99 pathogen control and host immune regulation to improve host survival.

100

## 101 **Introduction**

102 Meningitis caused by the encapsulated fungus *Cryptococcus neoformans* is a  
103 leading cause of death among HIV-infected immune suppressed patients in sub-Saharan  
104 Africa, accounting for 15% of their deaths worldwide (1). Despite frequent exposure to the  
105 yeast in the environment, cryptococcal infection is very rare in healthy individuals.  
106 Immune status is a critical determinant of risk for fatal cryptococcosis. Type 1 helper T  
107 cells may contain primary infection in the lungs as a cornerstone of protection among  
108 healthy person (with  $\approx 800$ -1200 circulating CD4+ T cells/ $\mu$ L) (2). However, most HIV-  
109 infected patients present with cryptococcal meningitis at a very advanced state of  
110 immunosuppression with CD4+ T cell counts  $< 50$  cells/ $\mu$ L (1).

111 B cells contribute to the development of a competent immune system by inducing  
112 naïve T cell activation, generating and maintaining serological memory, and regulating  
113 immune responses in health and in disease (3,4). In animal models, B cells produce  
114 antibodies against the cryptococcal polysaccharide capsule and other fungal antigens  
115 (5,6) that may attenuate infection and mediate fungal clearance (7). Specific antibodies  
116 may support opsonization and killing of the organism by phagocytes (8,9), neutralization  
117 of fungal virulence factors (10) or direct antibody-mediated toxicity and interference with  
118 fungal metabolism (7). B cells can produce either pro-inflammatory (e.g., IL-6, TNF- $\alpha$  and  
119 IFN- $\gamma$ ) (11) or anti-inflammatory cytokines (e.g., IL-10). IL-10-producing regulatory B cells,  
120 including plasma cells, modulate the activity of other immune cells in the local  
121 environment (4), as may B cells expressing surface immunomodulatory molecules such  
122 as PD-1 (12,13).

123 The contribution of pathogen-specific antifungal responses can be compromised  
124 during HIV-1 infection by polyclonal B cell activation and attenuated humoral responses  
125 to primary and recall antigens (14). Both *Cryptococcus* and HIV may have profound  
126 influences on B cell activation and differentiation and their effector and regulatory roles in  
127 the central nervous system (CNS) where most fatal cryptococcal disease occurs (15). To  
128 elucidate B cell signatures in AIDS-related cryptococcosis, we determined B cell  
129 phenotypes, activation and differentiation in blood and in CSF among persons with HIV  
130 with cryptococcal and non-cryptococcal meningitis and among HIV-negative healthy  
131 control subjects with neither infection and the association of these variables with survival.

132

## 133 **Results**

### 134 **Subjects and mortality in HIV-associated meningitis co-infections**

135 Age and gender did not differ significantly among the 3 study groups (Table 1).  
136 Circulating CD4+ T cell numbers were low in all HIV-infected subjects tested. CSF protein  
137 levels were similar among those with cryptococcal and non-cryptococcal meningitis.  
138 Although the Glasgow coma score was abnormal in only a quarter of subjects with  
139 cryptococcosis (<15 points), the 28-day mortality was high.

140 Among all HIV-infected subjects with known outcomes, 42.9% (15/35) died in this  
141 period, including 40% (12/30; deaths) of those with cryptococcal meningitis. Among  
142 subjects with cryptococcal meningitis, median survival time was 10 days (95%  
143 Confidence interval (CI), 4-19 days) for those dying by 28-days and 50 days (95% CI, 32-  
144 99 days) for those dying after 28 days. Median survival was 19 days (95% CI, 9-30 days)  
145 for 4 subjects with *Mycobacterium tuberculosis* meningitis. One subject with meningitis of  
146 unknown cause died in 19 days.

147  
148 **Overall B cell frequency and activation in blood and CSF among subjects with**  
149 **cryptococcosis.**

150 CD19+ B cells represented a greater proportion of circulating lymphocytes in blood  
151 among HIV-infected subjects with low CD4+ T cells compared with healthy controls,  
152 (medians, 12% in cryptococcosis, 27% in non-cryptococcosis and 4% in healthy controls;  
153 ANOVA,  $p < 0.001$ ) (Figure 2A). With HIV infection, B cells represented a higher proportion  
154 of lymphocytes in blood vs. CSF (medians, 12% vs. 2.3%, respectively;  $p < 0.001$ ) among  
155 cryptococcosis subjects and among non-cryptococcosis subjects (medians, 27% vs.  
156 2.6%, respectively;  $p = 0.011$ ).

157 B cell activation was significantly higher in both HIV-infected groups than among  
158 healthy controls in blood (medians, 55% and 53% vs. 7%, respectively,  $p < 0.03$ ) and  
159 higher yet in CSF, 68% and 77% (Figure 2B). Among cryptococcosis subjects, B cell

160 activation in CSF positively correlated with that in blood (Figure 2C), but not among non-  
161 cryptococcal subjects (not shown).

162

### 163 **B cell subsets and activation in blood and CSF**

164       Circulating B cells in blood showed distinct differences in subset distribution and  
165 activation. Naïve B cells predominated in blood in all groups (Figure 3A). Memory cells in  
166 blood were significantly lower among both HIV-infected groups compared with healthy  
167 control subjects. Tissue-like memory cells were over five-fold higher with HIV infection  
168 than in healthy controls. Plasmablasts/plasma cells, although a minority population in  
169 blood, were overrepresented with HIV infection (Figure 3A).

170       In the CSF, B cells showed a more differentiated phenotype with naïve cells  
171 representing only about a quarter of cells compared with the majority in blood in all groups  
172 (Figure 3A); these proportions correlated in the two compartments (Figure 3B). Memory  
173 cells were also prominent in the CSF, accounting for up to half of B cells, and also  
174 correlated with those in blood (Figure 3C), suggesting trafficking between the two  
175 compartments. Plasmablasts/plasma cells frequencies in CSF greatly exceeded those in  
176 blood in HIV-infected subjects with (medians, 13% vs. 0.7%;  $p < 0.001$ ) and without  
177 (medians, 9% vs. 1%;  $p = 0.008$ ) cryptococcosis (Figure 3A).

178       In addition to subset differences between circulating B cells, patients with HIV  
179 demonstrated significantly higher levels of activation in both naïve and memory cells  
180 compared with healthy controls (Figure 3D). Activation was greater yet in B cells in the  
181 CSF, particularly among naïve cells, as well as among memory cells. These data indicate  
182 that B cells that traffic and localize to the CSF may be activated by infection at that site.  
183 That such activation is comparable in the presence or absence of *Cryptococcus* suggests  
184 that the local activating infection may be chronic HIV itself or the acute secondary



185 pathogen. Thus, greater B cell differentiation characterizes the circulating B cell  
186 populations in HIV infection with or without cryptococcal meningitis infection, with  
187 prominent activated phenotypes being over expressed in the CSF.

188

## 189 **Preferential PD-1 expression on differentiated and activated B cells in blood and** 190 **CSF**

191 Programmed death-1 (PD-1) is a surface regulatory "check point" molecule  
192 identified prominently on T follicular helper cells and, less frequently, on B cells, NK cells,  
193 NKT cells and other myeloid derived cells (22). PD-1 was expressed on a minority of  
194 circulating B cells, but significantly more commonly on B cells in the CSF (Figure 4A). on  
195 CD19- lymphocytes, (majority T cells), PD-1 though most prominent in this cell population  
196 was more frequent in CSF than blood (Figure 4A). On the CD19- monocytes, was more  
197 frequently expressed on CSF of cryptococcosis patient than blood (Figure 4A). In blood,  
198 PD-1 expression was increased on more mature and on activated B cells, a pattern most  
199 directly applicable to healthy control subjects and those with cryptococcosis (Figure 4B).  
200 Most striking was the prominent high frequency of PD-1 on circulating CD27+ activated  
201 memory, on tissue-like memory and on plasmablasts/plasma cells in healthy controls and  
202 in the cryptococcosis co-infected group (Figure 4B).

203 Among other subsets, PD-1 was more commonly expressed on activated naive  
204 and CD27+ B cells from blood of healthy control subjects than of HIV-infected adults  
205 (Figure 4B and Supplementary Table S3). Among circulating B cells from adults with HIV  
206 infection, PD-1 was more prevalent on activated CD27+ memory activated and on Tissue-  
207 like memory, but not resting CD27+ memory B cells in those with *Cryptococcus* vs. non-  
208 cryptococcal meningitis.

209 As in blood, PD-1 in CSF was identified most frequently on PB/PC. These values  
210 were significantly associated in the two compartments among cryptococcosis subjects  
211 (Figure 4C). Thus, the preferential display of PD-1 on activated and differentiated memory  
212 B cells in the healthy controls and in those with cryptococcosis invokes the possibility of  
213 a regulatory role of this molecule on B cells in cryptococcal infection.

214  
215 **PD-1+ expression on plasmablasts/plasma cells correlates with mortality among**  
216 **cryptococcal meningitis subjects**

217 As noted above, overall mortality at 18 weeks was high in those with cryptococcal  
218 meningitis (18/30; 60%). Among the various B cell subsets, only PD-1+ expression on  
219 circulating plasmablasts/plasma cells was significantly associated with survival (also  
220 overall B cell activation by univariate but not multivariate analysis). Of the 10 subjects  
221 who died by 28 days after diagnosis with cryptococcosis, PD-1 was identified on a median  
222 of 7% of circulating plasmablasts/plasma cells. In sharp contrast, PD-1 was expressed by  
223 a median of 46% of these cells among 20 survivors (Figure 5B). Thus, low PD-1  
224 expression was associated with early mortality and high PD-1 expression with survival.

225 Using PD-1+ plasmablasts/plasma cells as a continuous variable, every 5 units  
226 increase in PD-1+ expression on these cells was associated with 17% less chance of  
227 death in the acute setting by 28 days when most mortality occurred (HR (95% CI) = 0.83  
228 (0.71, 0.98); p=0.02). This association of PD-1 on plasmablast/plasma cells at  
229 presentation was no longer significant with overall mortality at 140 days (18 weeks) (HR  
230 (95% CI) = 0.93 (0.84-1.02); p=0.13). In further exploration, using a cutoff point of 20%  
231 PD-1 plasmablasts/plasma cells expression, subjects with the PD-1 values  $\leq$  20% had  
232 had an increased risk of death (log rank p-value = 0.01; Figure 5C). Those with PD-1  
233 values < 20% had a 7-fold increased risk of 28-day mortality compared to those with PD-

234 1 > 20% (HR (95% CI) = 7.38 (1.69-34.36); p=0.01). While intriguing, the confidence  
235 interval is significant but wide, the p value is not very small, so this cutoff value is  
236 exploratory. By univariant analysis, only circulating B cell activation independently  
237 correlated with death (p=0.03); but not other reported risks for mortality (age, gender,  
238 Glasgow coma score, CSF protein, CSF white cell counts, or CSF fungal quantitative  
239 culture) (16,23). PD-1 expression on circulating B cells was associated with B cell  
240 activation in blood (Figure 5D). Whether these observations represent a plausible  
241 mechanistic impact of B cells and PD-1 on host survival or a secondary effect is under  
242 investigation.

243

## 244 **Discussion**

245 The persistence of the very high mortality caused by cryptococcal meningitis  
246 during HIV infection in sub-Saharan Africa despite early diagnosis (24) drives efforts to  
247 improve antifungal therapy and complementary immune mechanisms of control. We  
248 describe for the first time, the distinct B cell subset maturation, activation and regulatory  
249 markers in paired CSF and blood from HIV-infected individuals with and without  
250 cryptococcal meningitis and associated early mortality. The recognition that  
251 cryptococcosis during advanced HIV disease is both a systemic and neurologic disease  
252 is supported by the consistently high levels of the antigen in both blood and CSF at the  
253 time of or preceding clinical diagnosis. The related B cell response to the infection in both  
254 compartments is supported by the correlation between B cell subsets, activation and PD-  
255 1 expression in blood and CSF identified herein.

256 Consistent with earlier reports, circulating B cells from untreated viremic HIV-  
257 infected patients show diffuse activation, deficits in memory B cell frequencies and  
258 increased representation of tissue-like memory and plasmablast/plasma cells (25–29).

259 These results were consistent in patients with low CD4+ T cell numbers and meningitis  
260 due to *Cryptococcus* and other or indeterminate causes and substantially extend  
261 characterization of B cells in these co-infected subjects. We could not determine whether  
262 these prominent perturbations in blood B cell subsets and activation were due to the  
263 chronic effects of advanced HIV disease with an additional effect of acute secondary  
264 infection where cryptococcal antigen and symptoms develop 1-4 weeks prior to diagnosis  
265 (16,23,30,31). This distinction is important in determining whether patients with such  
266 advanced disease can actually generate a specific response to this systemic and local  
267 infection. That T cells to the fungus are detected in blood (32) and antibodies in blood  
268 (33,34) and CSF (Finn E, Okurut S, Janoff EN. manuscript in preparation) suggests that  
269 they can.

270 In this context, these data build on a limited but well-derived set of observations  
271 about the presence of B cells in the CSF during HIV infection. All studies have shown a  
272 predominance of T cells in CSF of HIV-infected subjects with and without *Cryptococcus*  
273 (21,35,36). Among HIV-1 infected adults without neurologic disease, uncharacterized B  
274 cells represented a small proportion ( $\approx 1\%$ ) of lymphocytes in the CSF, albeit more  
275 frequent than in healthy control subjects (35). We found that B cells in the CSF  
276 represented a median of 2.3% and 2.6% of lymphocytes with meningitis of *Cryptococcus*  
277 or other origin respectively. CSF B cells in our population were distinguished by prominent  
278 activation (median 77% and 68% CD21- B cells), a majority memory and tissue-like  
279 memory phenotype and high numbers of plasmablast/plasma cells (median 13 and 8% in  
280 the two meningitis groups). Akin to persons with multiple sclerosis (37,38), short-lived  
281 CSF plasmablasts were also reported to be increased in adults with HIV infection,  
282 particularly early in their course (39). That B cells and plasmablast frequencies in the CSF  
283 correlated with HIV RNA in the CSF and decreased with antiretroviral therapy in that study

284 implicated the virus as a stimulus for the presence of these cells. B cells and short-lived  
285 plasma blasts were also increased with neurosyphilis and declined with therapy (40),  
286 highlighting that secondary infections can also elicit these cells. We could not distinguish  
287 between the more prominent plasmablasts and infrequent plasma cells described with  
288 our markers, but the increased frequency of B cells of memory and plasmablast/plasma  
289 cell with meningitis are consistent with the CNS responses to neurosyphilis, viral  
290 meningitis and in multiple sclerosis (37–42). Whether ectopic germinal centers are  
291 present in the brain with cryptococcal meningitis, which has a prominent component in  
292 the brain parenchyma, as were identified with neurosyphilis (40) as a source of local B  
293 cell generation for antibody production, is under investigation.

294 A distinctive feature of B cells in both blood and CSF in this study was the  
295 prominent expression of the check-point regulatory marker PD-1. PD-1 (CD279) is well-  
296 recognized as a co-inhibitory molecule, particularly during chronic viral infection, e.g., with  
297 HIV, when its expression is associated with CD8+ T cell exhaustion, low proliferative  
298 capacity and effector function and HIV disease progression (43). In addition to CD4+ and  
299 CD8+ T cells, PD-1 is also expressed upon activation of NK T cells, monocytes and B  
300 cells. As an immunomodulatory surface receptor, PD-1 on B cells can downregulate  
301 responses elicited through the antigen-specific B cell receptor (BCR) by  
302 dephosphorylating key cytoplasmic signal transducers of BCR signaling ((44).

303 PD-1 on CD4+ T follicular helper cells supports reversible inhibition of B cell  
304 responses via interactions with PD-L1 on B cells during HIV infection (23). However, PD-  
305 1 on B cells also has diverse and potent effects on B cell function with systemic impact.  
306 Among our subjects with cryptococcal and other forms of meningitis, PD-1 expression  
307 was increased on activated B cells, particularly CD27+ and tissue-like memory cells, as  
308 reported by others (43,45). Indeed, microbial antigens, modeled by toll-like receptor-9

309 agonists, augmented PD-1 expression on human B cells and IL-10 production (46). Akin  
310 to its effects on T cells, PD-1 on B cells can inhibit B cell activation, suppress B cell  
311 proliferation and impair B cell inflammatory cytokine responses (12,13,45,47).

312 Although less prominent on human B cells, PD-1 has been described at high levels  
313 among SIV-infected macaques in association with loss of memory B cells and fatal  
314 intestinal infection (48). The prominence of PD-1 on B cells in our patients with  
315 cryptococcal meningitis and the associated early and high mortality associated with its  
316 expression on plasma cells are consistent with these results in primates who also died  
317 with secondary infections. Blockade of PD-1 in the macaques augmented SIV-specific  
318 antibodies and improved survival. Thus, PD-1 on B cells may limit the antibody-producing  
319 effector function of B cells directly, and loss of innate-like IgM<sup>+</sup> CD27<sup>+</sup> memory B cells  
320 population that produces natural IgM antibodies is associated with risk of cryptococcosis  
321 among HIV infected individuals (49,50). PD-1 on B cells can also limit the effector activity  
322 of neighboring CD4<sup>+</sup> and CD8<sup>+</sup> T cells (14) and monocytes to clear cryptococcal infection  
323 by both PD-1-dependent and -independent IL-10-mediated regulatory mechanisms.

324 Thus, during cryptococcal infection in subjects with advanced HIV disease, PD-1  
325 expression is prominently increased in frequency on B cells, and plasmablasts/plasma  
326 cells in particular, in both blood and CSF. The association of high PD-1 expression on  
327 circulating B cells with mortality suggests that this immunomodulatory protein may  
328 synergize B cell function, including antibody responses to *Cryptococcus*. Antibodies have  
329 been shown to facilitate control of his infection by mediating phagocytosis, effecting  
330 antibody dependent cytotoxicity by CD8<sup>+</sup> T and NK cells and by directly inhibiting  
331 cryptococcal metabolism (7,8). Direct interactions of PD-1 with CD4<sup>+</sup> and CD8<sup>+</sup> T cells  
332 and monocytes, as well as production of IL-10, may also inhibit their ability to promote  
333 control of the organism in this population at high risk of serious disease complicated by

334 neurologic sequelae and death. Control of chronic HIV infection will down-regulate PD-1  
335 on T and B cells. However, mortality occurs early in the course of infection so, as shown  
336 in the SIV rhesus macaque model, blockade of PD-1 at this early stage may also promote  
337 both direct clearance and production of effective *Cryptococcus*-specific antibodies and  
338 enhance cellular immune function to promote clearance and limit relapse of this infection  
339 in persons with advanced HIV disease. We propose that understanding the mechanisms  
340 of induction of PD-1 on B cells in this setting and characterizing the consequent immune  
341 dysfunction will advance our understanding of the multiple facets of HIV-associated  
342 immune dysfunction and help prevent and resolve these serious opportunistic infections.

343

## 344 **Materials and Methods**

### 345 **Study Participants**

346 HIV-infected adults in Kampala, Uganda with cryptococcal meningitis  
347 (cryptococcosis) (n=31) and with non-cryptococcal meningitis; (non-cryptococcosis)  
348 (n=12) were selected from three prospective HIV meningitis clinical cohort studies: 1)  
349 Cryptococcal Optimal Antiretroviral Timing (COAT) trial (16), 2) Neurological Outcomes  
350 on Antiretroviral Therapy (NOAT) study (17) and 3) Adjunctive Sertraline for the  
351 Treatment of HIV Associated Cryptococcal Meningitis (ASTRO) trial (18). Inclusion  
352 criteria were; clinical evidence of meningitis, age  $\geq 18$  years, documented HIV infection,  
353 not receiving ART at enrollment and availability of cryopreserved cells from blood and  
354 CSF (Table 1). HIV infection was confirmed by bedside testing of previously undiagnosed  
355 subjects using the Ugandan Ministry of Health/WHO HIV testing algorithm.  
356 Cryptococcosis was confirmed by the presence of cryptococcal antigen by lateral flow  
357 assay (Immy Inc., Norman, Oklahoma, USA) in CSF and CSF cryptococcal quantitative  
358 cultures (19). The non-cryptococcal meningitis subjects were confirmed with

359 tuberculosis and rifampicin gene xpert, 16S rRNA, and by quantitative fungal and  
360 bacterial culture as previously described in this HIV meningitis cohort (17). Of the non-  
361 cryptococcal meningitis co-infected subjects, 4 had *Mycobacterium tuberculosis*  
362 meningitis, 1 had neurosyphilis, toxoplasmosis and *Mycobacterium tuberculosis* co-  
363 infections while, 7 were without a known HIV co-infecting etiology. Whole blood, but not  
364 CSF, was obtained from healthy control subjects with neither HIV nor cryptococcal  
365 infection (n=10) from an HIV observational rural Ugandan cohort (20). Subjects  
366 prospectively provided informed written consent for the parent studies. Makerere  
367 University Research Ethics Committee granted ethical approval for use of stored  
368 specimens from previously consented adults. None of the subjects was on steroids, on  
369 ART or on anti-fungal therapy prior to sample collection.

370

### 371 **Sample Preparation**

372 Peripheral blood mononuclear cells (blood) and CSF samples were collected  
373 within 72 hours of meningitis diagnosis. Blood and CSF cells were isolated and  
374 cryopreserved as previously described (21) in Roswell Park Memorial Institute enriched  
375 medium (69%) supplemented with 20% fetal bovine serum, 10% dimethyl sulphoxide and  
376 1% penicillin/streptomycin in vapor phase in liquid nitrogen until testing. Blood and CSF  
377 cells were thawed, and cell viabilities and cell recoveries determined using an automated  
378 Guava PCA instrument before antibody staining for flow cytometry.

379 After thawing, median cell viability was 91% (range, 75-98%) from the CSF and  
380 98% (Range 95–100%) from frozen PBMC. Median cells recovery was  $1.2 \times 10^6$  cells  
381 (Range  $0.1-5 \times 10^6$  million cells) per subject from CSF and  $8 \times 10^6$  (Range,  $3-25 \times 10^6$  cells)  
382 per subject from blood.

383



## 384 **Immunophenotyping**

385 Thawed blood and CSF cells were stained with murine monoclonal antibodies  
386 reactive with human CD45 (FITC; clone HI30), CD20 (APC-Cy7; clone 2H7), and CD38  
387 (PE-Cy7; clone HIT2) (Biolegend, San Diego, CA). CD19 (V500; clone HIB19) (BD  
388 Horizon, San Jose, CA); CD27 (PerCP-Cy5.5; clone M-T271), PD-1 (PE; clone EH12.1)  
389 and IgG (APC; clone G18-145) (BD Pharmingen, San Jose, CA) and CD21 (Pacific Blue;  
390 clone LT21; EXBIO Praha a. s., Czech Republic). CD45 expression was used to  
391 discriminate white blood cells in CSF and in blood from *Cryptococcus* yeast cells. Data  
392 were acquired using BD FACS Canto II, 8-color flow cytometer with BD Diva Software  
393 (BD Bioscience San Jose, CA, USA) and analyzed using FlowJo version 9.7.7 (Tree Star  
394 Ashland, Ore. USA). Gating was established for CD21, IgG, PD-1, CD38, CD20, and  
395 CD27 expression using fluorescence minus one controls. Spectral overlap was  
396 compensated using BD FACS compensation positive mouse Igk beads and BD FACS  
397 Compensation negative mouse Igk beads (BD Biosciences San Jose, CA, USA). A  
398 representative gating scheme is shown in Figure 1.

399

## 400 **B cell Differentiation and Activation**

401 Based on results in Figure 1 and designations in Supplementary Table 1,  
402 CD45+CD19+ lymphocytes were characterized as resting or activated (CD21+ vs. CD21-  
403 respectively) naive (CD20+/CD27-/IgG-), memory (CD27+ or CD27-/CD20+IgG+CD38-),  
404 tissue-like memory (CD27-/CD21<sup>low</sup>/IgG+) B cells and plasmablasts/plasma cells  
405 (PB/PCs) (CD20-CD27++/CD38++/CD21<sup>low</sup>). Combined subsets accounted for 97.8-  
406 98.3% of gated CD19+ B cells in blood and 67.9% - 82.0% in the CSF in each group.

407

## 408 **Statistical Analysis**

409 Data were analyzed using GraphPad Prism for Macintosh version 8.0 (San Diego,  
410 California, USA). Non-parametric Wilcoxon signed-rank test analyzed paired continuous  
411 variables, Mann-Whitney U-test and Kruskal Wallis tests analyzed unpaired continuous  
412 variables, and Kruskal Wallis test; analysis of variance (ANOVA) analyzed three group  
413 data. Survival was summarized with Kaplan-Meier plots and compared between groups  
414 with a log-rank test. Proportional hazards regression models were used to quantify the  
415 risk of death between groups. Survival data were censored at time of death, loss to follow-  
416 up, or at 18-weeks (the minimum follow-up time for the three studies). P-value  $\leq 0.050$   
417 was considered statistically significant.

418

#### 419 **Acknowledgements**

420 We thank Joshua Rhein, Abdu Musubire, Nabeta Henry, Jane Francis Ndyetukira,  
421 Cynthia Ahimbisibwe, Florence Kugonza, Alisat Sadiq, Radha Rajasingham, Catherine  
422 Nanteza, Richard Kwizera, and Darlisha Williams from Infectious Diseases Institute for  
423 patient care. For flow cytometry research support, we thank Jeremy Rahkola, Tina M.  
424 Powell (Mucosal and Vaccine Research Center, University of Colorado Denver and  
425 Veterans Affairs Research Program) and Stefanie Sowinski and Olive Mbabazi (Infectious  
426 Diseases Institute, Makerere University Translational Sciences Laboratory). We thank  
427 Barbara Castelnuovo, Stephen Okoboi, Aidah Nanvuma, Angella Sandra Namwase from  
428 Infectious Diseases Institute, Research Department, and Research Capacity  
429 Development Unit for the mentorship and site supervision. We thank the Proscovia  
430 Naluyima, Alison Taylor, Britta Flach and the management of Makerere University Walter  
431 Reed Project Mulago Laboratory for supporting the project. We thank Damalie Nakanjako  
432 from the Department of Medicine, College of Health Sciences, Makerere University for  
433 healthy subjects specimens from her HIV seronegative observational cohort.

434 **Author contribution**

435 Samuel Okurut, David B. Meya, Freddie Bwanga, Fatim Cham-Jallow, David R.  
436 Boulware, Edward N. Janoff, Yukari C. Manabe, Katharine H. Hullsiek and Michael A.  
437 Eller, conceptualized the study, contributed to framing of the research questions,  
438 participated in data analysis, drafting and revising the manuscript. Joseph Olobo, Paul R.  
439 Bohjanen, provided critical insights in manuscript revisions. Samuel Okurut, David B.  
440 Meya, Harsh Pratap and Brent Palmer designed the study panels, performed the  
441 immunological assays, analyzed the data and revised the manuscript.

**References**

1. Rajasingham R, Rachel MS, Benjamin JP, Joseph NJ, Nelesh PG, Tom MC, et al. Global burden of disease of HIV-associated cryptococcal meningitis: an updated analysis. *Lancet Infect Dis*. 2017 Aug;17(8):873–81.
2. Tenforde MW, Scriven JE, Harrison TS, Jarvis JN. Immune correlates of HIV-associated cryptococcal meningitis. *PLoS Pathog*. 2017;13(3):4–11.
3. Pieper, K; Grimbacher, B; Eibel H. B-cell biology and development. *J Allergy Clin Immunol*. 2013 Apr;131(4):959–71.
4. Bankó Z, Pozsgay J, Szili D, Tóth M, Gáti T, Nagy G, et al. Induction and Differentiation of IL-10–Producing Regulatory B Cells from Healthy Blood Donors and Rheumatoid Arthritis Patients. *J Immunol*. 2017;198(4):1512–20.
5. Voelz K, May RC. Cryptococcal interactions with the host immune system. *Eukaryot Cell*. 2010;9(6):835–46.
6. Coelho C, Casadevall A. Cryptococcal therapies and drug targets: the old, the new and the promising. Vol. 18, *Cellular Microbiology*. 2016. p. 792–9.
7. McClelland EE, Nicola AM, Prados-Rosales R, Casadevall A. Ab binding alters

- gene expression in *Cryptococcus neoformans* and directly modulates fungal metabolism. *J Clin Invest.* 2010;120(4):1355–61.
8. Janoff EN, Frank DN. Pathogen-specific antibodies: codependent no longer. *J Clin Invest.* 2010 Apr;120(4):1039–42.
  9. Elsegeiny W, Marr KA, Williamson PR. Immunology of Cryptococcal Infections: Developing a Rational Approach to Patient Therapy. *Front Immunol.* 2018;9:651.
  10. Feldmesser M, Mednick A, Casadevall A. Antibody-Mediated Protection in Murine *Cryptococcus neoformans* Infection Is Associated with Pleiotropic Effects on Cytokine and Leukocyte Responses. *J Infect Dis.* 2002;70(3):1571–80.
  11. Li R, Rezk A, Li H, Gommerman JL, Prat A, Bar-Or A, et al. Antibody-Independent Function of Human B Cells Contributes to Antifungal T Cell Responses. *J Immunol.* 2017;160:1572.
  12. Ray A, Wang L, Dittel BN. IL-10-independent regulatory B-cell subsets and mechanisms of action. *Int Immunol.* 2015;27(10):531–6.
  13. Wang X, Wang G, Wang Z, Liu B, Han N, Li J, et al. PD-1-expressing B cells suppress CD4 + and CD8 + T cells via PD-1/PD-L1-dependent pathway. *Mol Immunol.* 2019;109(December 2018):20–6.
  14. Moir S, Ho J, Malaspina A, Wang W, DiPoto AC, O’Shea MA, et al. Evidence for HIV-associated B cell exhaustion in a dysfunctional memory B cell compartment in HIV-infected viremic individuals. *J Exp Med.* 2008;205(8):1797–805.
  15. Kardava L, Moir S. B-cell abnormalities in HIV-1 infection: roles for IgG3 and T-bet. *Curr Opin HIV AIDS.* 2019 Jul;14(4):240–5.
  16. Boulware DR, Meya DB, Muzoora C, Rolfes MA, Huppler Hullsiek K, Musubire A, et al. Timing of antiretroviral therapy after diagnosis of cryptococcal meningitis. *N Engl J Med.* 2014;370(26):2487–98.

17. Rajasingham R, Rhein J, Klammer K, Musubire A, Nabeta H, Akampurira A, et al. Epidemiology of meningitis in an HIV-infected Ugandan cohort. *Am J Trop Med Hyg.* 2015;92(2):274–9.
18. Rhein J, Morawski BM, Hullsiek KH, Nabeta HW, Kiggundu R, Tugume L, et al. Efficacy of adjunctive sertraline for the treatment of HIV-associated cryptococcal meningitis: an open-label dose-ranging study. *Lancet Infect Dis.* 2016 Jul;16(7):809–18.
19. Hansen J, Slechta ES, Gates-Hollingsworth MA, Neary B, Barker AP, Bauman S, et al. Large-scale evaluation of the immuno-mycologics lateral flow and enzyme-linked immunoassays for detection of cryptococcal antigen in serum and cerebrospinal fluid. *Clin Vaccine Immunol.* 2013;20(1):52–5.
20. Nakanjako D, Otit-Sengeri J, Ssewanyana I, Nabatanzi R, Bayigga L, Kirimunda S, et al. CD4 T-cell activation and reduced regulatory T-cell populations are associated with early development of cataracts among HIV-infected adults in Uganda. *Immunol Lett.* 2014;161(1):44–9.
21. Meya DB, Okurut S, Zziwa G, Rolfes MA, Kelsey M, Cose S, et al. Cellular immune activation in cerebrospinal fluid from ugandans with cryptococcal meningitis and immune reconstitution inflammatory syndrome. *J Infect Dis.* 2015;211(10):1597–606.
22. Buermann A, Römermann D, Baars W, Hundrieser J, Klempnauer J, Schwinzer R. Inhibition of B-cell activation and antibody production by triggering inhibitory signals via the PD-1/PD-ligand pathway. *Xenotransplantation.* 2016;23(5):347–56.
23. Jarvis JN, Bicanic T, Loyse A, Namarika D, Jackson A, Nussbaum JC, et al. Determinants of mortality in a combined cohort of 501 patients with HIV-associated cryptococcal meningitis: Implications for improving outcomes. *Clin*

- Infect Dis. 2014;58(5):736–45.
24. Meya DB, Kiragga AN, Nalintya E, Morawski BM, Rajasingham R, Park BJ, et al. Reflexive Laboratory-Based Cryptococcal Antigen Screening and Preemptive Fluconazole Therapy for Cryptococcal Antigenemia in HIV-Infected Individuals With CD4 <100 Cells/microL: A Stepped-Wedge, Cluster-Randomized Trial. *J Acquir Immune Defic Syndr*. 2019 Feb;80(2):182–9.
  25. Rohatgi S, Nakouzi A, Carreno LJ, Slosar-Cheah M, Kuniholm MH, Wang T, et al. Antibody and B Cell Subset Perturbations in Human Immunodeficiency Virus-Uninfected Patients With Cryptococcosis. *Open forum Infect Dis*. 2018 Jan;5(1):ofx255.
  26. Rethi B, Sammicheli S, Amu S, Pensieroso S, Hejdeman B, Schepis D, et al. Concerted effect of lymphopenia, viraemia and T-cell activation on Fas expression of peripheral B cells in HIV-1-infected patients. *AIDS*. 2013 Jan;27(2):155–62.
  27. Nicholson LK, Pratap H, Bowers E, Gunzburger E, Bandi SR, Gardner EM, et al. Effective B cell activation in vitro during viremic HIV-1 infection with surrogate T cell stimulation. *Immunobiology*. 2018 Dec;223(12):839–49.
  28. Moir S, Fauci AS. B-cell responses to HIV infection. Vol. 275, *Immunological Reviews*. 2017. p. 33–48.
  29. Amu S, Lavy-Shahaf G, Cagigi A, Hejdeman B, Nozza S, Lopalco L, et al. Frequency and phenotype of B cell subpopulations in young and aged HIV-1 infected patients receiving ART. *Retrovirology*. 2014;11(1):1–13.
  30. Nunes J de O, Tsujisaki RA de S, Nunes M de O, Lima GME, Paniago AMM, Pontes ERJC, et al. Cryptococcal meningitis epidemiology: 17 years of experience in a State of the Brazilian Pantanal. *Rev Soc Bras Med Trop*. 2018;51(4):485–92.
  31. George IA, Santos CAQQ, Olsen MA, Powderly WG. Epidemiology of

- cryptococcosis and cryptococcal meningitis in a large retrospective cohort of patients after solid organ transplantation. *Open Forum Infect Dis.* 2017;4(1):1–7.
32. Jarvis JN, Casazza JP, Stone HH, Meintjes G, Lawn SD, Levitz SM, et al. The phenotype of the cryptococcus-specific CD4+ memory T-cell response is associated with disease severity and outcome in HIV-associated cryptococcal meningitis. *J Infect Dis.* 2013;207(12):1817–28.
33. Hlupeni A, Nakouzi A, Wang T, Boyd KF, Makadzange TA, Ndhlovu CE, et al. Antibody Responses in HIV-Infected Patients With Advanced Immunosuppression and Asymptomatic Cryptococcal Antigenemia. *Open forum Infect Dis.* 2019 Jan;6(1):ofy333.
34. Yoon HA, Nakouzi A, Chang CC, Kuniholm MH, Carreno LJ, Wang T, et al. Association Between Plasma Antibody Responses and Risk for Cryptococcus-Associated Immune Reconstitution Inflammatory Syndrome. *J Infect Dis.* 2019 Jan;219(3):420–8.
35. Ho EL, Ronquillo R, Altmepfen H, Spudich SS, Price RW, Sinclair E. Cellular Composition of Cerebrospinal Fluid in HIV-1 Infected and Uninfected Subjects. *PLoS One.* 2013;8(6).
36. Kowarik MC, Cepok S, Sellner J, Grummel V, Weber MS, Korn T. CXCL13 is the major determinant for B cell recruitment to the CSF during neuroinflammation. *J Neuroinflammation.* 2012;1–11.
37. Cepok S, Rosche B, Grummel V, Vogel F, Zhou D, Sayn J, et al. Short-lived plasma blasts are the main B cell effector subset during the course of multiple sclerosis. *Brain.* 2005;128(7):1667–76.
38. Wurth S, Kuenz B, Bsteh G, Ehling R, Di Pauli F, Hegen H, et al. Cerebrospinal fluid B cells and disease progression in multiple sclerosis - A longitudinal

- prospective study. *PLoS One*. 2017;12(8):e0182462.
39. Cepok S, von Geldern G, Nolting T, Grummel V, Srivastava R, Zhou D, et al. Viral load determines the B-cell response in the cerebrospinal fluid during human immunodeficiency virus infection. *Ann Neurol*. 2007 Nov;62(5):458–67.
  40. Yu Q, Cheng Y, Wang Y, Wang C, Lu H, Guan Z, et al. Aberrant humoral immune responses in neurosyphilis: CXCL13/CXCR5 play a pivotal role for B-cell recruitment to the cerebrospinal fluid. *J Infect Dis*. 2017;216(5):534–44.
  41. Atkinson JR, Hwang M, Reyes-Rodriguez A, Bergmann CC. Dynamics of Virus-Specific Memory B Cells and Plasmablasts following Viral Infection of the Central Nervous System. *J Virol*. 2019;93(2):1–18.
  42. Prat A, Alter A, Edwards DR, Yong VW, Biernacki K, Nuttall RK, et al. Determinants of Human B Cell Migration Across Brain Endothelial Cells. *J Immunol*. 2014;170(9):4497–505.
  43. Velu V, Shetty RD, Larsson M, Shankar EM. Role of PD-1 co-inhibitory pathway in HIV infection and potential therapeutic options. *Retrovirology*. 2015 Feb;12:14.
  44. Okazaki T, Maeda A, Nishimura H, Kurosaki T, Honjo T. PD-1 immunoreceptor inhibits B cell receptor-mediated signaling by recruiting src homology 2-domain-containing tyrosine phosphatase 2 to phosphotyrosine. *Proc Natl Acad Sci U S A*. 2001 Nov;98(24):13866–71.
  45. Thibult M, Mamessier E, Gertner-Dardenne J, Pastor S, Just-Landi S, Xerri L, et al. PD-1 is a novel regulator of human B-cell activation. *Int Immunol*. 2013 Feb;25(2):129–37.
  46. Liu B-S, Cao Y, Huizinga TW, Hafler DA, Toes REM. TLR-mediated STAT3 and ERK activation controls IL-10 secretion by human B cells. *Eur J Immunol*. 2014 Jul;44(7):2121–9.



47. Ahn E, Araki K, Hashimoto M, Li W, Riley JL, Cheung J, et al. Role of PD-1 during effector CD8 T cell differentiation. *Proc Natl Acad Sci*. 2018;(29):201718217.
48. Titanji K, Velu V, Chennareddi L, Vijay-Kumar M, Gewirtz AT, Freeman GJ, et al. Acute depletion of activated memory B cells involves the PD-1 pathway in rapidly progressing SIV-infected macaques. *J Clin Invest*. 2010 Nov;120(11):3878–90.
49. Moir S, Fauci AS. B cells in HIV infection and disease. *Nat Rev Immunol*. 2009;9(4):235–45.
50. Subramaniam K, French N, Pirofski L-A. Cryptococcus neoformans-reactive and total immunoglobulin profiles of human immunodeficiency virus-infected and uninfected Ugandans. *Clin Diagn Lab Immunol*. 2005 Oct;12(10):1168–76.
51. Moir S, Buckner CM, Ho J, Wang W, Chen J, Waldner AJ, et al. B cells in early and chronic HIV infection: evidence for preservation of immune function associated with early initiation of antiretroviral therapy. *Blood*. 2010 Dec 16;116(25):5571–9.

## TABLES

**Table 1. Baseline characteristics of HIV infected participants with cryptococcal meningitis, non-cryptococcal meningitis and healthy control subjects.**

| Groups                            | Cryptococcal meningitis |                      | Non-cryptococcal meningitis |                       | Healthy controls |                       | P value |
|-----------------------------------|-------------------------|----------------------|-----------------------------|-----------------------|------------------|-----------------------|---------|
|                                   | N                       | Median [IQR] or N[%] | N                           | Median [IQR] or N [%] | N                | Median [IQR] or N [%] |         |
| <b>Summary statistics</b>         |                         |                      |                             |                       |                  |                       |         |
| N                                 | 31                      |                      | 12                          |                       | 10               |                       |         |
| <b>Clinical</b>                   |                         |                      |                             |                       |                  |                       |         |
| Age [years]                       | 31                      | 38 [32-41]           | 12                          | 39 [35-45]            | 8                | 39 [36.5-46.5]        | 0.81    |
| Female Gender                     | 31                      | 8 [25.8%]            | 12                          | 6[50%]                | 8                | 4[50.0%]              | 0.13    |
| Weight [Kg]                       | 15                      | 54 [50-58.0]         | 3                           | 60 [51.0-74.0]        |                  |                       | 0.31    |
| CD4+ T cells/ul [normal 800-1200] | 22                      | 13.5 [6-46.3]        | 7                           | 53.0 [7.0-279.0]      |                  |                       | 0.3     |
| Currently on ART                  | 31                      | 2 [6.5%]             | 12                          | 0 [0.0%]              |                  |                       |         |
| Currently receiving TB therapy    | 31                      | 1 [3.2%]             | 12                          | 1 [8.3%]              |                  |                       | 0.48    |
| Glasgow coma score <15            | 30                      | 7 [23.3%]            | 12                          | 7 [58.3%]             |                  |                       | 0.03    |

| CSF Parameters                                                                  |    |             |    |             |      |
|---------------------------------------------------------------------------------|----|-------------|----|-------------|------|
| Quantitative                                                                    | 30 | 4.6         | 12 | 0[0-0]      |      |
| cryptococcal                                                                    |    | [4.1-5.3]   |    |             |      |
| CFU/mL[Log10]                                                                   |    |             |    |             |      |
| Sterile                                                                         | 30 | 1[3.3%]     | 12 | 12[100.0%]  |      |
| cryptococcal                                                                    |    |             |    |             |      |
| cultures                                                                        |    |             |    |             |      |
| Opening pressure                                                                | 25 | 259         | 11 | 230         | 0.32 |
| [mm/H2O]                                                                        |    | [160-370]   |    | [128-278]   |      |
| Opening pressure                                                                | 25 | 12[48.0%]   | 11 | 3[27.3%]    | 0.25 |
| >250 mm/H2O                                                                     |    |             |    |             |      |
| Total WBC counts                                                                | 28 | 17.5        | 11 | 65          | 0.45 |
| [cells/ $\mu$ L]                                                                |    | [4.0-112.5] |    | [4.0-320.0] |      |
| Total WBC counts                                                                | 28 | 15[53.6%]   | 11 | 7[63.6%]    | 0.57 |
| >5 [cells/ $\mu$ L]                                                             |    |             |    |             |      |
| CSF protein                                                                     | 30 | 59          | 12 | 95.5        | 0.16 |
| [mg/dL]                                                                         |    | [20.0-97.0] |    | [43-187.0]  |      |
| 1 Chi-square test for proportions. Kruskal-Wallis tests for continuous measures |    |             |    |             |      |
| 2 Kruskal-Wallis test for medians for comparing groups**                        |    |             |    |             |      |

WBC – White blood cells, CFU – colony forming units, PD-1 – Programmed death-1 inhibitory receptor, HIV+CM+ - HIV-infected and cryptococcal meningitis patients, HIV+ Non-CM: HIV-infected non-cryptococcal meningitis patients; Controls: healthy controls without HIV or without cryptococcosis. IQR – interquartile range.

## Figure legends

**Figure 1. B cell gating strategy used to characterize activation and cellular differentiation in blood and CSF illustrated entirely on blood.** Leukocytes are distinguished by expression of CD45+ expression [A] to exclude cryptococcal yeasts and selected for single lymphocytes [B-C]. PD-1 is gated on CD19- monocytes (D-E) and CD19- lymphocytes (F-G). B cell subsets (F-K) are defined per Supplementary Table 1, as described earlier (14,51). Gates indicated for PD-1, CD21 and CD38 were determined using fluorescence minus one cut-off [not shown], used to define subset expression, activation and PD-1 expression.

## Figure 2. B cells Frequency and Activation in blood and in cerebrospinal fluid

Frequency of CD19+ B cells among lymphocytes [A], and B cell Activation [CD21<sup>lo</sup>] by flow cytometry [B-C]. Samples were collected at presentation from Healthy controls subjects [blood samples; n=10], HIV-infected subjects with Cryptococcosis [blood n=31 and matched CSF n=31 samples] and with non-Cryptococcal meningitis [blood n=7 and CSF n=6 samples]. Values were compared using either Mann-Whitney U-test or using Kruskal Wallis and Spearman's correlation coefficient. Horizontal bars indicate median values and \* - asterisks show statistically significant results for p values <0.05.

## Figure 3. Distribution of B cell subsets and activation in blood and CSF.

Frequency of B cell subsets among CD19+ lymphocytes by flow cytometry [defined in Supplemental Table 1]. Control samples [blood; n=10], cryptococcosis subjects samples [blood and CSF; n=31], and non-cryptococcosis subjects samples [blood & CSF; n=7]. Results are shown as medians [95% CI]. Values are compared using either Mann-Whitney U-test or Kruskal Wallis. \* - asterisks show statistically significant results for p values <0.05.

**Figure 4. Expression of PD-1 on among healthy controls and among cryptococcosis subjects.** Controls blood samples, [n=10], non-cryptococcosis samples, [blood; n=7 & CSF; n=7] and cryptococcosis samples, [blood; n=31 & CSF; n=31]. Results; **[A]**, PD-1+ expression measured as a frequency of CD19+ B cells **[B]**, Correlation of the frequency of PD-1+ expression on plasmablasts/plasma cells in blood and in CSF **[C]**, PD-1+ expression among B cell subsets. Bars show median values. Group values were compared using either Mann-Whitney U-test or using Kruskal Wallis. \* = p value < 0.05.

**Figure 5. Programmed Death-1 expression on blood plasmablast/plasma cells at onset of cryptococcosis predicts 28-day survival or mortality.** PD-1 – programmed death-1 receptor, PB/PC – Plasmablasts/plasma cells, Non-CM – HIV and non-cryptococcal meningitis co-infection, CM - Cryptococcal meningitis. **[A]** Individual profile of PD-1+ PB/PCs among low and high PD-1+ PB/PCs. **[B]** frequency of PD-1+ plasmablasts/plasma cells measured as frequency of PD-1+ expressing plasmablasts/plasma cells among cryptococcosis subjects who died by 28 days [n=10] Vs. Survivors at 28 days [n=20]. **[C]** Kaplan-Meier survival outcomes over time among cryptococcal meningitis subjects with low [<20%] [n=14] and high [>20%] [n=16] PD-1 expression on plasmablasts/plasma cells. **[D]** PD-1+ and CD21 low expression on B cells. Hazard ratio was determined as log rank of survival days. Censored subjects; Three cryptococcosis patients were lost to follow-up after hospital discharge and were excluded from the survival analysis. Mortality was determined at 18 weeks of follow-up.

## Figures

Figure 1.

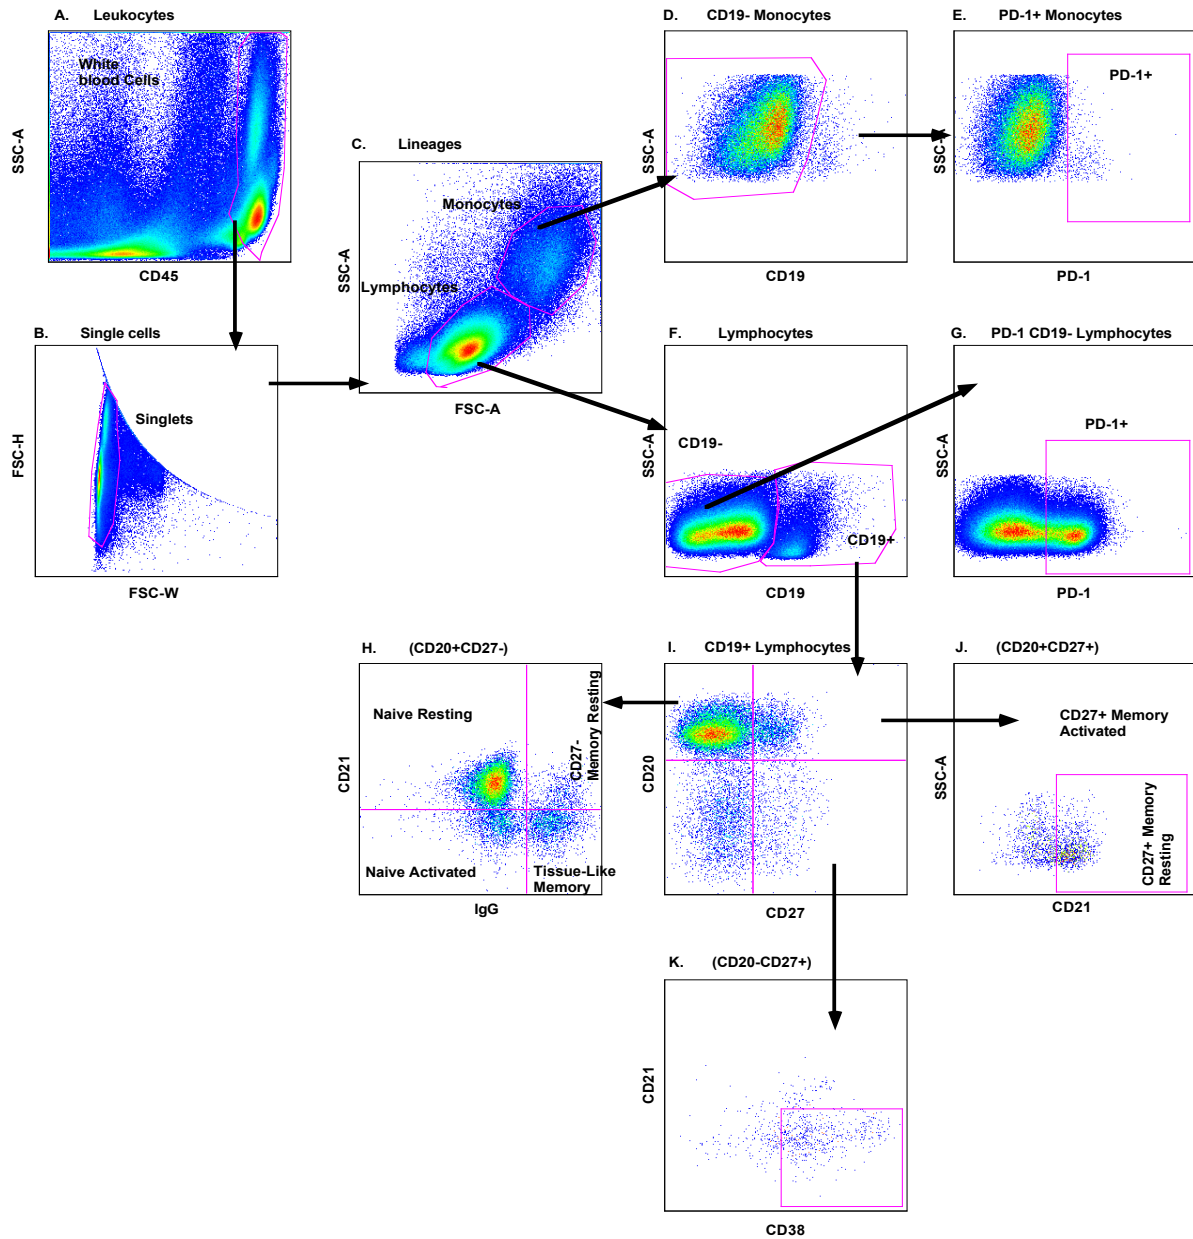

Figure 2.

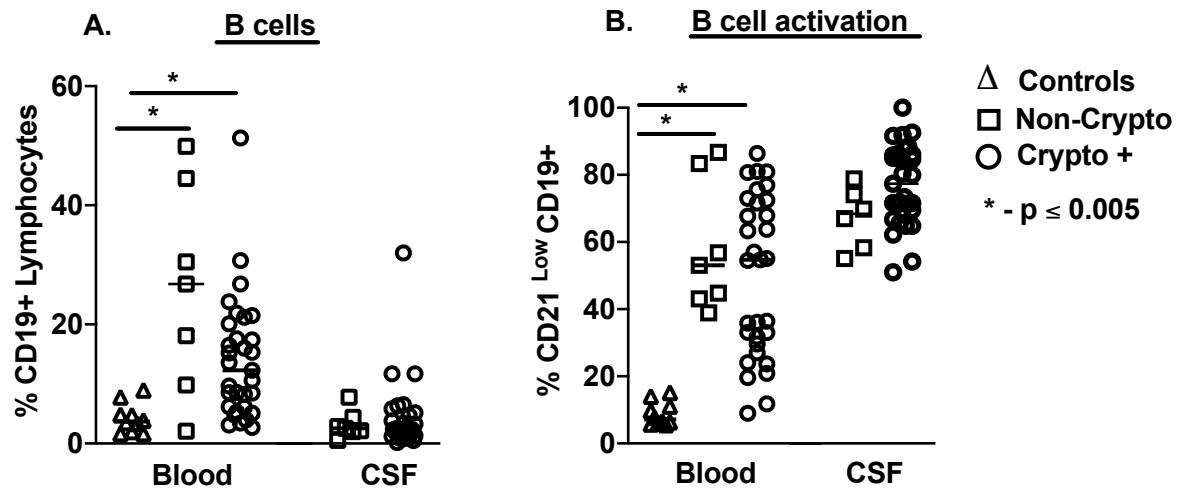

**C. Activation in cryptococcal meningitis**

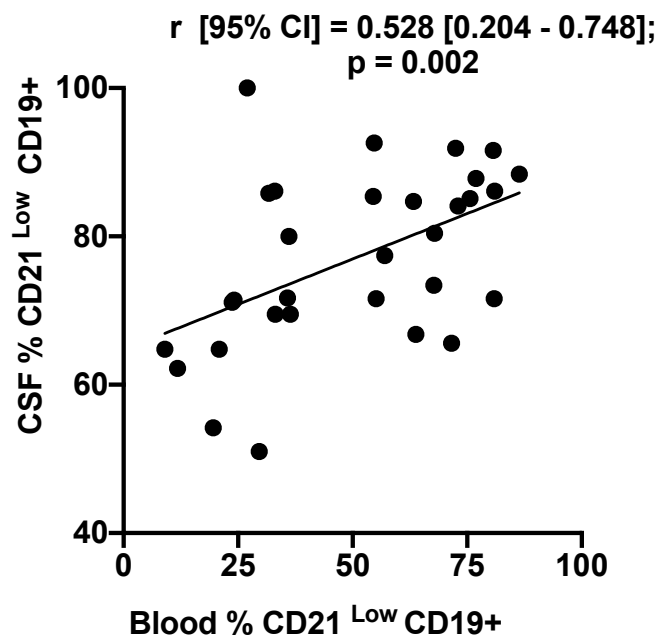

Figure 3.

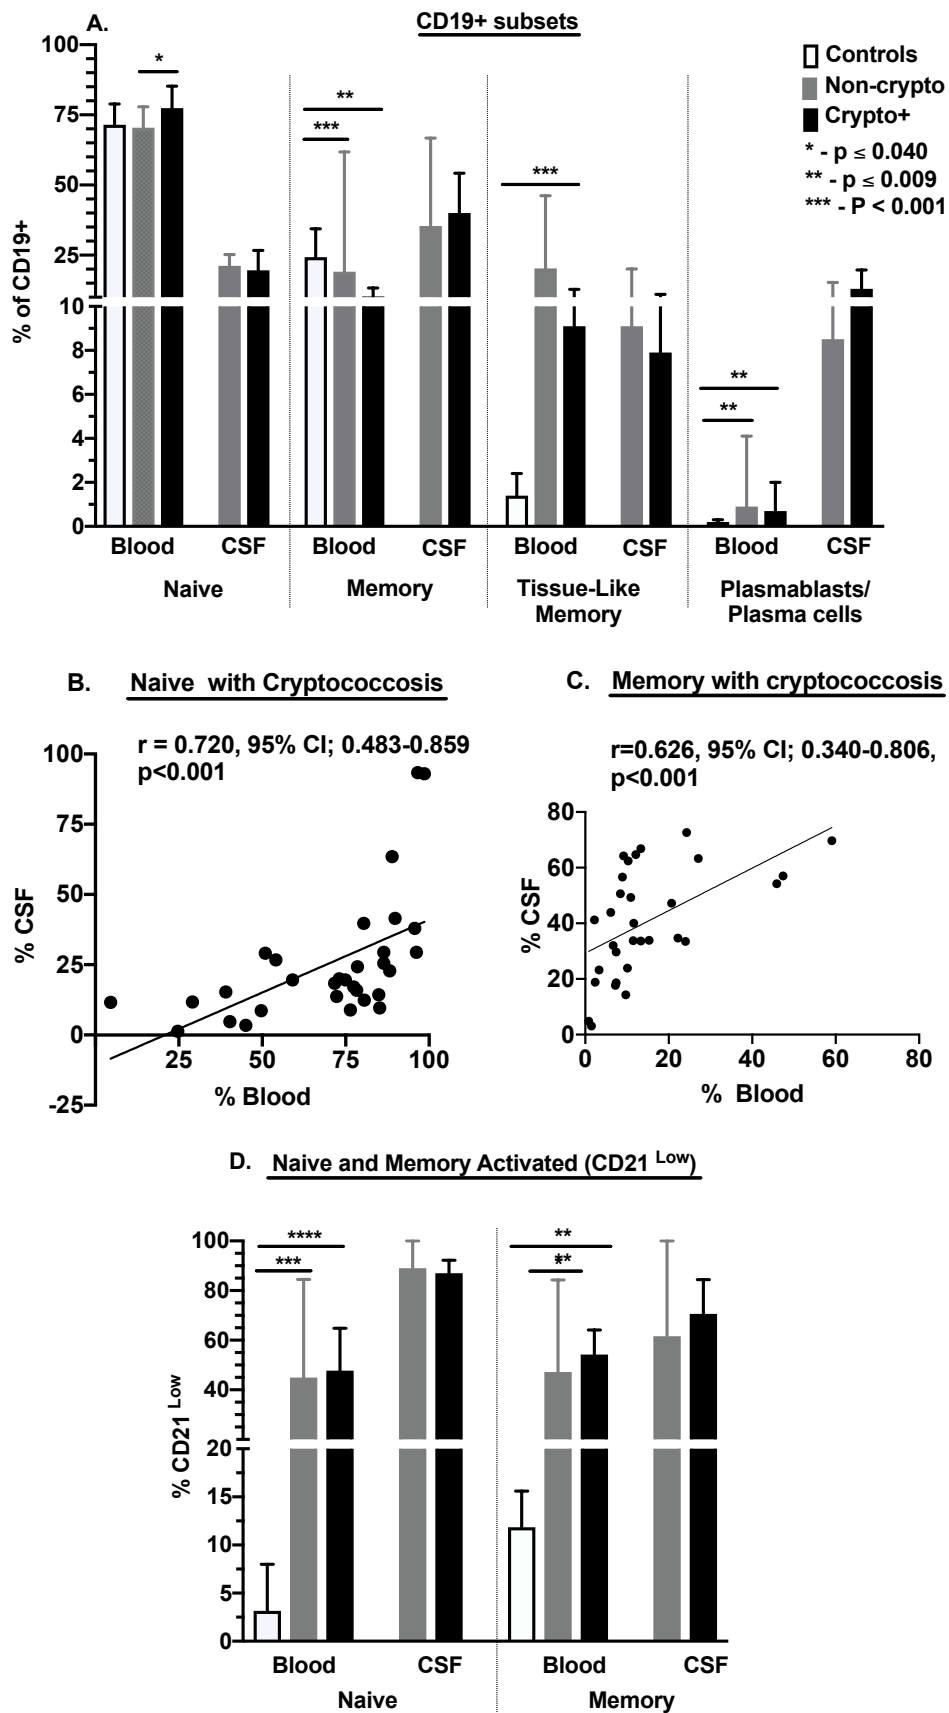



Figure 4.

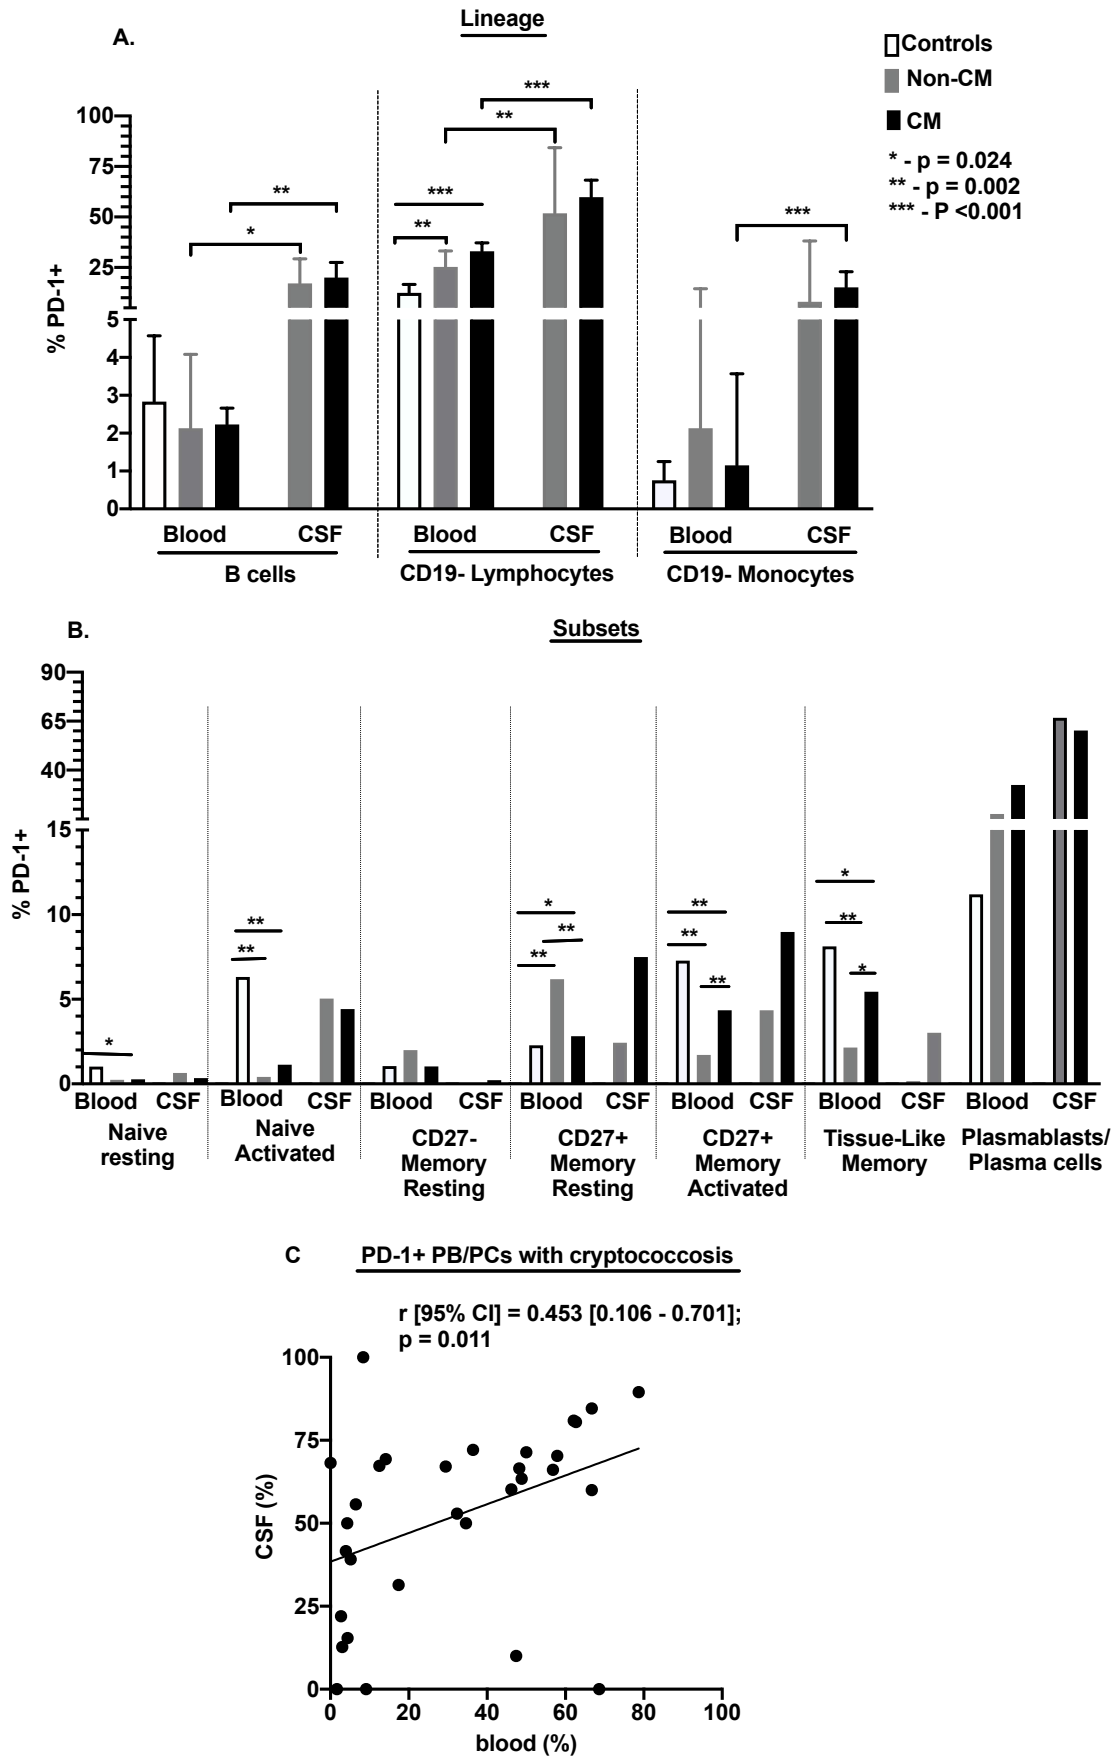

Figure 5.

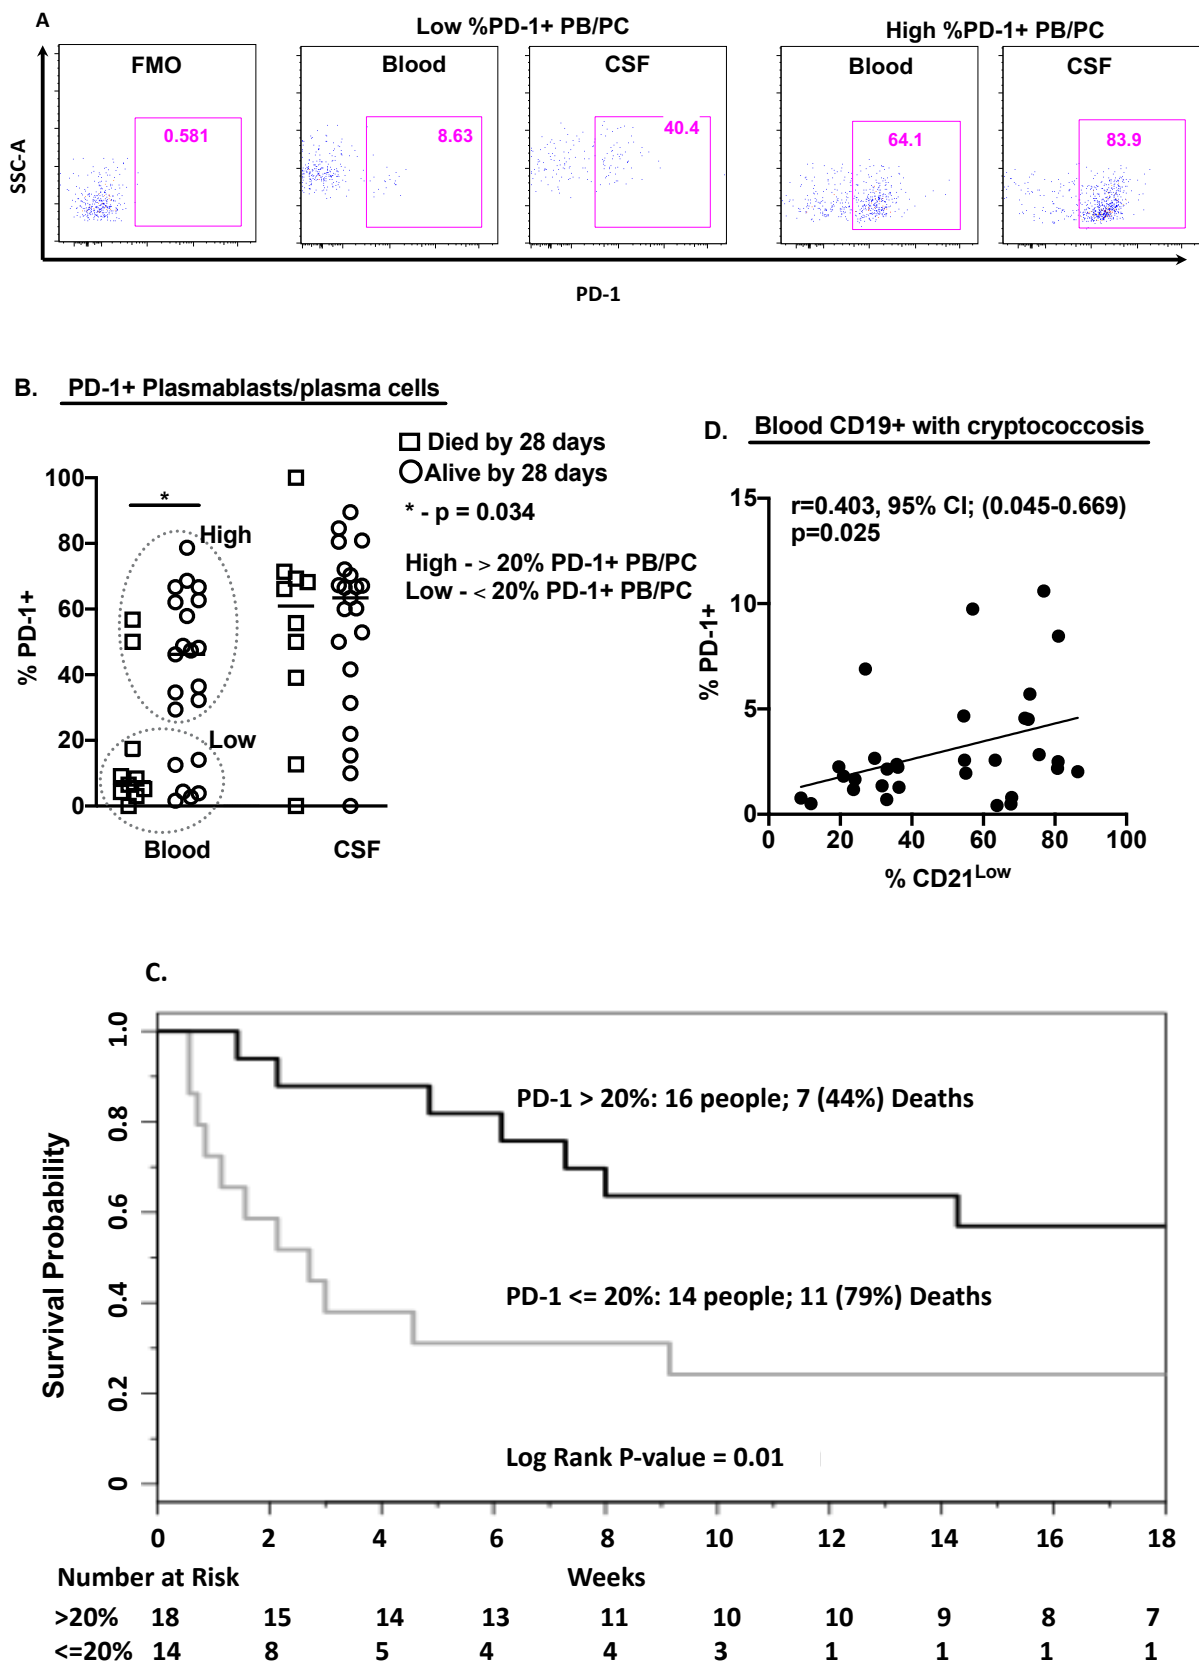

### Supplementary Table S1. Markers of B cell subsets and activation

| B cell phenotypes      | CD45 | CD19 | CD20 | CD27 | IgG | CD21 | CD38 | PD-1 |
|------------------------|------|------|------|------|-----|------|------|------|
| <b>Naïve resting</b>   | +    | +    | +    | -    | -   | +    | -    | +/-  |
| <b>Naïve activated</b> | +    | +    | +    | -    | -   | -    | -    | +/-  |
| <b>CD27- Memory</b>    | +    | +    | +    | -    | +   | +    | -    | +/-  |
| <b>Resting</b>         |      |      |      |      |     |      |      |      |
| <b>Tissue-Like</b>     | +    | +    | +    | -    | +   | -    | -    | +/-  |
| <b>Memory</b>          |      |      |      |      |     |      |      |      |
| <b>CD27+ Memory</b>    | +    | +    | +    | +    | +/- | +    | -    | +/-  |
| <b>resting</b>         |      |      |      |      |     |      |      |      |
| <b>CD27+ Memory</b>    | +    | +    | +    | +    | +/- | -    | -    | +/-  |
| <b>activated</b>       |      |      |      |      |     |      |      |      |
| <b>Plasmablast/</b>    | +    | +    | -    | +    | +/- | -    | +    | +/-  |
| <b>Plasma cells</b>    |      |      |      |      |     |      |      |      |

Positive [+] shows presence of marker expression, negative [-] shows absence of marker expression and [+/-] show either presence or absence of marker expression.

**Supplementary Table S2. B cell subsets and activation in cerebrospinal fluid [CSF] and blood among subjects with HIV-1 infection and cryptococcal and non-cryptococcal meningitis**

| Study group,         | Blood               | CSF                 | P value | Blood               | CSF                 | P value |
|----------------------|---------------------|---------------------|---------|---------------------|---------------------|---------|
| B cell subsets       | CM                  | CM                  |         | Non-CM              | Non-CM              |         |
| n                    | 31                  | 31                  |         | 7                   | 7                   |         |
| Naïve resting        | 35.8<br>[18.9-60.5] | 2.6<br>[0.7-8.6]    | <0.001  | 16<br>[10.9-39.9]   | 2.6<br>[0.8-13.2]   |         |
| Naïve activated      | 28.4<br>[15.6-38.3] | 15.2<br>[8.5-22.8]  | 0.007   | 53.1<br>[43.1-83.4] | 68.4<br>[57.5-75.3] |         |
| CD27- Memory resting | 1.4<br>[0.4-3.2]    | 1.9<br>[0.3-4.5]    |         | 2.3<br>[0.9-29.5]   | 5.1<br>[2.9-11.9]   |         |
| Tissue-like memory   | 9.1<br>[3.4-20.2]   | 7.9<br>[4.4-12.2]   | 0.001   | 20.3<br>[6.5-22.4]  | 9.1<br>[4.3-18.5]   |         |
| CD27+ Memory resting | 3.5<br>[1.2-5.4]    | 8.5<br>[3.4-13.9]   | 0.001   | 5.2<br>[0.8-11.4]   | 11.3<br>[8.7-22.4]  |         |
| CD27+ Memory resting | 4.9<br>[2.0-9.3]    | 27.2<br>[14.3-39.9] | <0.001  | 5.9<br>[2.7-17.7]   | 24.7<br>[21.1-33.3] |         |

|         |           |            |        |           |            |       |
|---------|-----------|------------|--------|-----------|------------|-------|
| Plasma  | 0.7       | 13         | <0.001 | 0.9       | 8.5        | 0.008 |
| blasts/ | [0.2-2.4] | [3.3-20.9] |        | [0.6-1.3] | [4.4-14.2] |       |
| Plasma  |           |            |        |           |            |       |
| cells   |           |            |        |           |            |       |

All values as shown are median [IQR] percent of CD19+ B cells. P values were calculated with either Wilcoxon paired t-test; [Within cryptococcosis infected individuals: CSF vs. Blood comparisons] or Mann-Whitney unpaired U-test; [cryptococcosis vs. Non-cryptococcosis].

**Supplementary Table S3. Programmed Death-1 [PD-1+] Expression on B Cell Subsets in CSF and in Blood with HIV infection with and without Cryptococcal Meningitis**

| <b>Study group,</b>                   | <b>Blood,</b>      | <b>CSF,</b>         | <b>P</b>         | <b>Blood,</b>      | <b>CSF, Non-</b>   | <b>P</b>     |
|---------------------------------------|--------------------|---------------------|------------------|--------------------|--------------------|--------------|
| <b>PD-1+ B cells</b>                  | <b>CM</b>          | <b>CM</b>           | <b>value</b>     | <b>Non-CM</b>      | <b>CM</b>          | <b>value</b> |
| <b>n</b>                              | <b>31</b>          | <b>31</b>           |                  | <b>7</b>           | <b>7</b>           |              |
| <b>Naïve resting</b>                  | 0.3<br>[0.2-1.0]   | 0.3<br>[0-2.6]      |                  | 0.2<br>[0.1-2.0]   | 0.6<br>[0-2.2]     |              |
| <b>Naïve activated</b>                | 1.1<br>[0.7-1.9]   | 4.4<br>[1.4-7.7]    | <b>&lt;0.001</b> | 0.4<br>[0.2-1.3]   | 5.0<br>[1.3-16.5]  |              |
| <b>CD27- Memory resting</b>           | 1.0<br>[0.6-3.6]   | 0.2<br>[0-4.1]      |                  | 1.9<br>[0-8.6]     | 0<br>[0-0.5]       | <b>0.009</b> |
| <b>Tissue-like memory</b>             | 5.4<br>[3.0-8.0]   | 3.0<br>[0.5-4.8]    | <b>0.003</b>     | 2.2<br>[1.1-3.3]   | 0.1<br>[0-1.8]     |              |
| <b>CD27+ Memory resting</b>           | 2.8<br>[1.0-4.9]   | 7.5<br>[2.5-17.8]   | <b>0.001</b>     | 6.2<br>[3.1-14.6]  | 2.4<br>[0-20.0]    |              |
| <b>CD27+ Memory activated</b>         | 4.4<br>[2.4-6.7]   | 9.0<br>[4.4-17.5]   | <b>0.001</b>     | 1.7<br>[0.8-3.5]   | 4.4<br>[0-21.3]    |              |
| <b>Plasmablasts/<br/>Plasma cells</b> | 32.3<br>[5.2-56.8] | 60.2<br>[31.4-70.3] | <b>&lt;0.001</b> | 17.6<br>[5.9-26.1] | 66.7<br>[44.5-100] | <b>0.026</b> |

All values as shown are medians [IQR] and percent of parent [B cells subsets]. P values were calculated with either Wilcoxon paired t-test; [within Cryptococcosis subjects; CSF Vs. Blood comparisons or Mann-Whitey unpaired U-test among non-cryptococcosis subjects Vs. Non-cryptococcosis subjects.
